# Supplementary material for: Identification, Characteristics and Function of Phosphoglucomutase (PGM) in the Agar Biosynthesis and Carbon Flux in the Agarophyte Gracilariopsis lemaneiformis (Rhodophyta)
Source: MDPI journal article supplement (doi:10.3390/md20070442), 2022-07-02
Supplement: s1 [file s1]

A

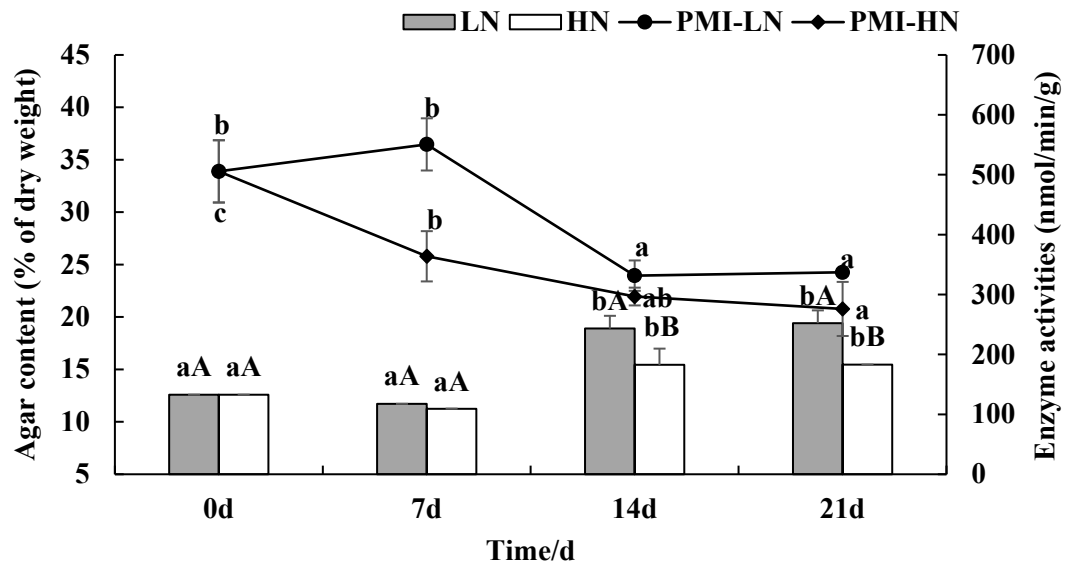

B

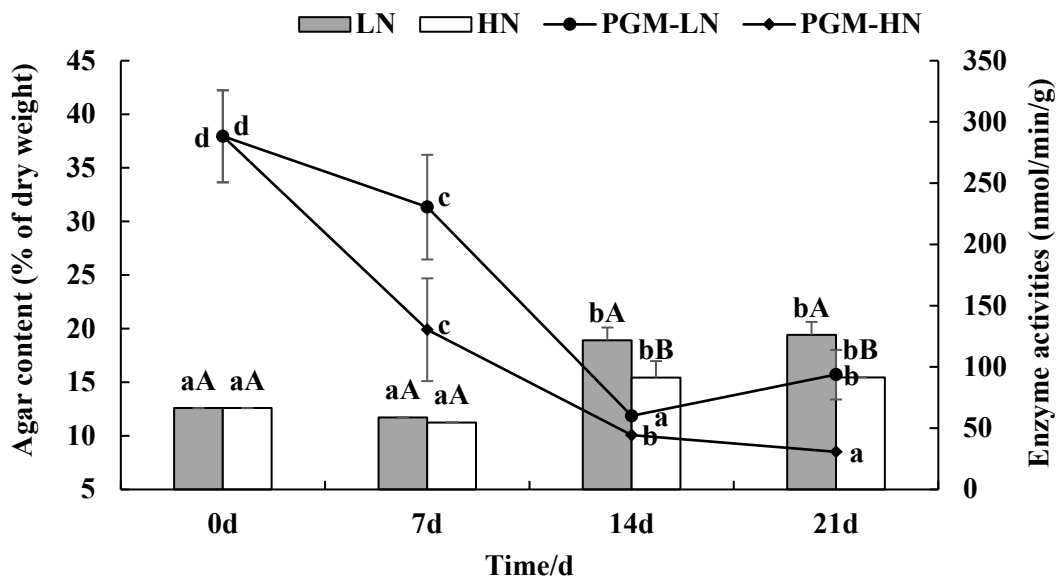

C

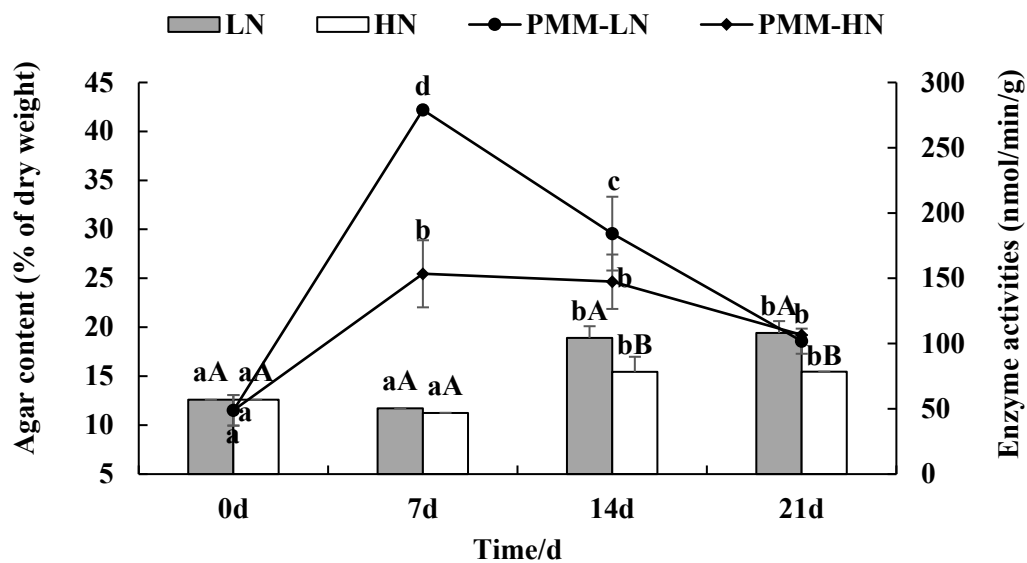

D

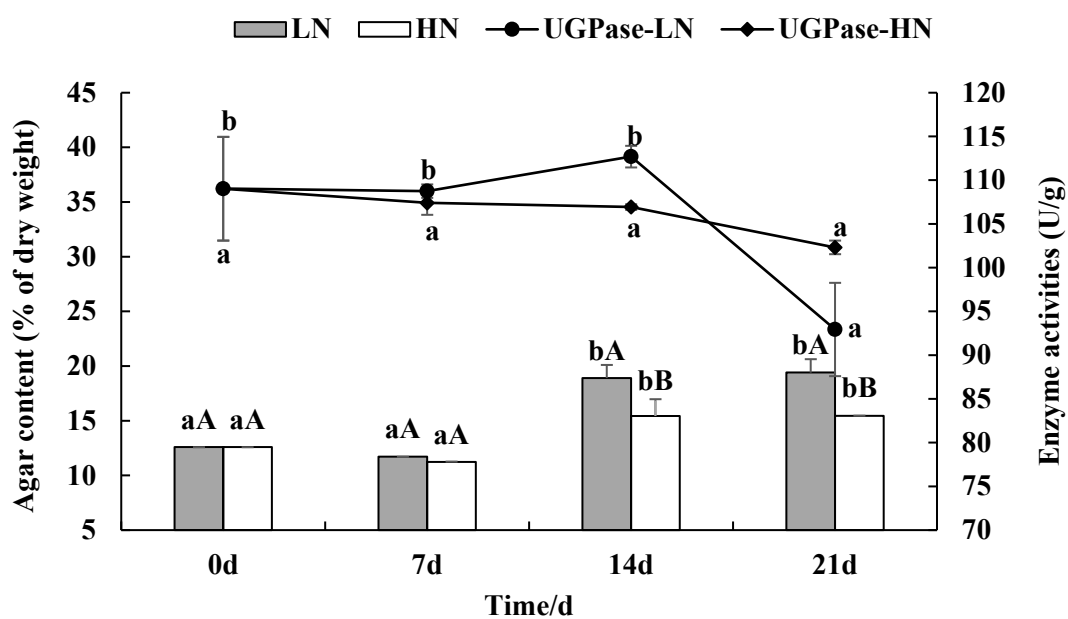

Figure S2 The changes of enzymic activities and agar contents in agar biosynthesis pathway in *Gracilariopsis lemaneiformis* in limited nitrogen (LN) and normal nitrogen (HN) treatments. A: PMI, mannose-6-phosphate isomerase; B: PGM, phosphoglucomutase; C: PMM, phosphomannomutase; D: UGPase, UDP-glucose pyrophosphorylase. The lowercase and capital letters represent significant difference of agar contents and enzymic activities in different treatments,

respectively ( $p < 0.05$ ).
