# Supplementary material for: Identification, Characteristics and Function of Phosphoglucomutase (PGM) in the Agar Biosynthesis and Carbon Flux in the Agarophyte Gracilariopsis lemaneiformis (Rhodophyta)
Source: MDPI journal article supplement (doi:10.3390/md20070442), 2022-07-02
Supplement: s1 [file s1]

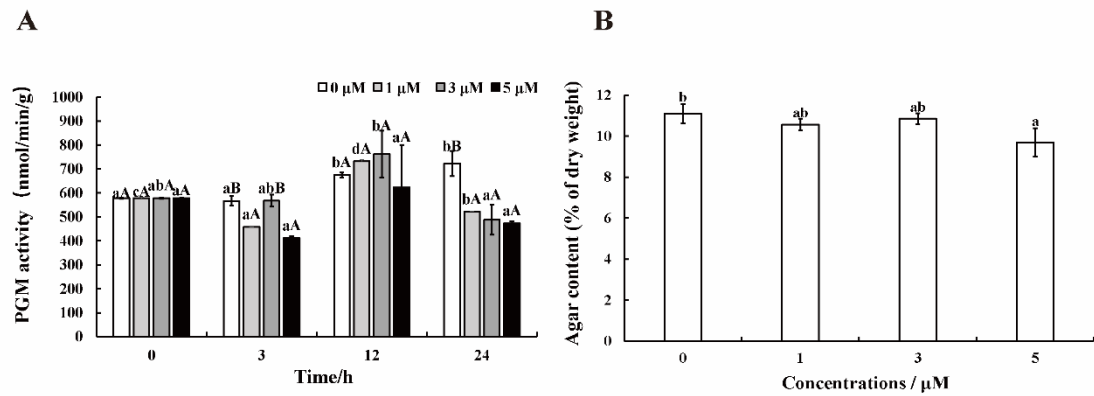

Figure S6 Phosphoglucumutase (PGM) activities and agar contents of *Gracilariopsis lemaneiformis* under PGM inhibited condition. A: PGM activities under different PGM inhibitor concentrations within 24 h. B: agar contents under different PGM inhibitor concentrations at 24 h. The lowercase letters represent significant difference of the treatment with time, and capital letters represent significant differences between different treatments ( $p < 0.05$ ).
