# Supplementary material for: Identification, Characteristics and Function of Phosphoglucomutase (PGM) in the Agar Biosynthesis and Carbon Flux in the Agarophyte Gracilariopsis lemaneiformis (Rhodophyta)
Source: MDPI journal article supplement (doi:10.3390/md20070442), 2022-07-02
Supplement: s1 [file s1]

**Table S2** The information of phosphoglucomutase (PGM) protein sequences from genome of different species

| Taxonomy                         | Species       | Gene ID        |
|----------------------------------|---------------|----------------|
| <i>Arabidopsis thaliana</i>      | Spermatophyta | NP_199995.1    |
|                                  |               | NP_173732.1    |
|                                  |               | NP_177230.1    |
|                                  |               | NP_001154464.1 |
|                                  |               | NP_001154465.1 |
|                                  |               | NP_001320476.1 |
|                                  |               | NP_177239.1    |
|                                  |               | NP_001332305.1 |
|                                  |               | NP_001318587.1 |
|                                  |               | NP_001190326.1 |
|                                  |               | NP_001332304.1 |
|                                  |               | NP_568359.2    |
|                                  |               | XP_012467251.1 |
|                                  |               | XP_012467267.1 |
| <i>Gossypium raimondii</i>       | Spermatophyta | XP_012454357.1 |
|                                  |               | XP_012454356.1 |
|                                  |               | XP_012454355.1 |
|                                  |               | XP_012454353.1 |
|                                  |               | XP_012467252.1 |
|                                  |               | XP_012440230.1 |
|                                  |               | XP_012459882.1 |
|                                  |               | XP_015614961.1 |
|                                  |               | XP_015632142.1 |
|                                  |               | XP_015643632.1 |
| <i>Oryza sativa</i>              | Spermatophyta | XP_015647517.1 |
|                                  |               | XP_015647516.1 |
|                                  |               | XP_015643633.1 |
|                                  |               | XP_008675355.1 |
|                                  |               | NP_001355137.1 |
|                                  |               | NP_001105405.1 |
|                                  |               | NP_001105703.1 |
|                                  |               | XP_008652327.1 |
|                                  |               | XP_008652325.1 |
|                                  |               | XP_008673528.1 |
| <i>Zea mays</i>                  | Spermatophyta | XP_035816183.1 |
|                                  |               | XP_020395615.1 |
|                                  |               | XP_020395614.2 |
|                                  |               | XP_001689884.1 |
|                                  |               | XP_001697992.1 |
|                                  |               |                |
| <i>Chlamydomonas reinhardtii</i> | Chlorophyta   |                |

|                                           |               |                         |
|-------------------------------------------|---------------|-------------------------|
|                                           |               | XP_001697991.1          |
|                                           |               | XP_001695635.1          |
| <i>Micromonas pusilla</i>                 | Chlorophyta   | XP_003056074.1          |
|                                           |               | XP_003056559.1          |
| <i>Ostreococcus lucimarinus</i> CCE9901   | Chlorophyta   | XP_001421345.1          |
|                                           |               | XP_001415757.1          |
| <i>Aureococcus anophagefferens</i>        | Ochrophyta    | XP_009036707.1          |
|                                           |               | XP_009035725.1          |
|                                           |               | CBJ31711.1              |
| <i>Ectocarpus siliculosus</i>             | Ochrophyta    | CBN79734.1              |
|                                           |               | CBJ48481.1              |
|                                           |               | CBJ29496.1              |
|                                           |               | Phatr3_EG02613.p1       |
| <i>Phaeodactylum tricornutum</i>          | Ochrophyta    | Phatr3_J32708.p1        |
|                                           |               | Phatr3_J16571.p1        |
|                                           |               | Phatr3_EG02240.p1       |
|                                           |               | PXF45253.1              |
| <i>Gracilariopsis chorda</i>              | Rhodophyta    | PXF46312.1              |
|                                           |               | PXF42557.1              |
|                                           |               | PXF44087.1              |
|                                           |               | XP_005717610.1          |
| <i>Chondrus crispus</i>                   | Rhodophyta    | XP_005713583.1          |
|                                           |               | XP_005717288.1          |
|                                           |               | XP_005538026.1          |
| <i>Cyanidioschyzon merolae</i> strain 10D | Rhodophyta    | XP_005539294.1          |
|                                           |               | XP_005534981.1          |
|                                           |               | XP_005535333.1          |
|                                           |               | OSX75697.1              |
| <i>Porphyra umbilicalis</i>               | Rhodophyta    | OSX73648.1              |
|                                           |               | OSX71554.1              |
|                                           |               | OSX69066.1              |
|                                           |               | evm.model.contig_2285.4 |
| <i>Porphyridium purpureum</i>             | Rhodophyta    | evm.model.contig_452.2  |
|                                           |               | evm.model.contig_3397.5 |
|                                           |               | evm.model.contig_4446.7 |
| <i>Phytophthora sojae</i>                 | Stramenopiles | XP_009532079.1          |
|                                           |               | XP_009514793.1          |
|                                           |               | CRG86074.1              |
| <i>Talaromyces islandicus</i>             | Ascomycota    | CRG91341.1              |
|                                           |               | CRG92507.1              |
| <i>Microsporium canis</i>                 | Ascomycota    | XP_002850691.1          |
|                                           |               | XP_002843246.1          |
| <i>Trichormus variabilis</i>              | Cyanobacteria | WP_011320468.1          |
|                                           |               | WP_011318541.1          |

|                                  |         |                |
|----------------------------------|---------|----------------|
|                                  |         | WP_011319151.1 |
|                                  |         | WP_011317071.1 |
| <i>Caldivirga maquilingensis</i> | Archaea | WP_156769897.1 |
|                                  |         | WP_048063059.1 |

---
