# Supplementary material for: Identification, Characteristics and Function of Phosphoglucomutase (PGM) in the Agar Biosynthesis and Carbon Flux in the Agarophyte Gracilariopsis lemaneiformis (Rhodophyta)
Source: MDPI journal article supplement (doi:10.3390/md20070442), 2022-07-02
Supplement: s1 [file s1]

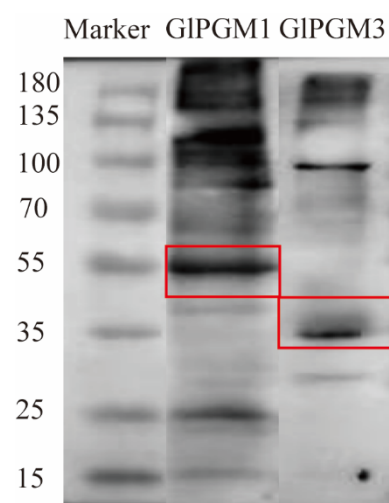

Figure S7 Western blot analysis of GIPGM1 and GIPGM3 in *Gracilariopsis lemaneiformis*. Red boxes indicate the GIPGM1 and GIPGM3 proteins.
