# Supplementary material for: Identification, Characteristics and Function of Phosphoglucomutase (PGM) in the Agar Biosynthesis and Carbon Flux in the Agarophyte Gracilariopsis lemaneiformis (Rhodophyta)
Source: MDPI journal article supplement (doi:10.3390/md20070442), 2022-07-02
Supplement: s1 [file s1]

**Table S1** PCR information for the amplification and cloning of *GLPGM1*, *GLPGM2* and *GLPGM3*

| Primers                   | Sequence (5'-3')                            | restriction endonuclease | Tm (°C) | PCR products |
|---------------------------|---------------------------------------------|--------------------------|---------|--------------|
| Glp <sub>gm1</sub> -ORF5' | CGC <u>GAATTC</u> ATGGCTTCGACTTTCAAGGTC     | <i>EcoR</i> I            | 62      | 1758bp       |
| Glp <sub>gm1</sub> -ORF3' | CGC <u>AAGCTT</u> TTAAGTGATAACTGTGGGCTTC    | <i>Hind</i> III          |         |              |
| Glp <sub>gm2</sub> -ORF5' | CGC <u>GAGCTC</u> ATGAGCCAGATCCCCCAATC      | <i>Sac</i> I             | 58      | 1743bp       |
| Glp <sub>gm2</sub> -ORF3' | CGC <u>CTCGAG</u> TTAAGTAATCACTGTGGGAGC     | <i>Xho</i> I             |         |              |
| Glp <sub>gm3</sub> -ORF5' | CGC <u>GAATTC</u> ATGTACTCCTTCATCACCTCC     | <i>EcoR</i> I            | 65      | 1719bp       |
| Glp <sub>gm3</sub> -ORF3' | CGC <u>AAGCTT</u> TTAATTCTTCTGAATGTATTGCTGC | <i>Hind</i> III          |         |              |

The underline represents restriction endonuclease sequence.
