# Supplementary material for: Identification, Characteristics and Function of Phosphoglucomutase (PGM) in the Agar Biosynthesis and Carbon Flux in the Agarophyte Gracilariopsis lemaneiformis (Rhodophyta)
Source: MDPI journal article supplement (doi:10.3390/md20070442), 2022-07-02
Supplement: s1 [file s1]

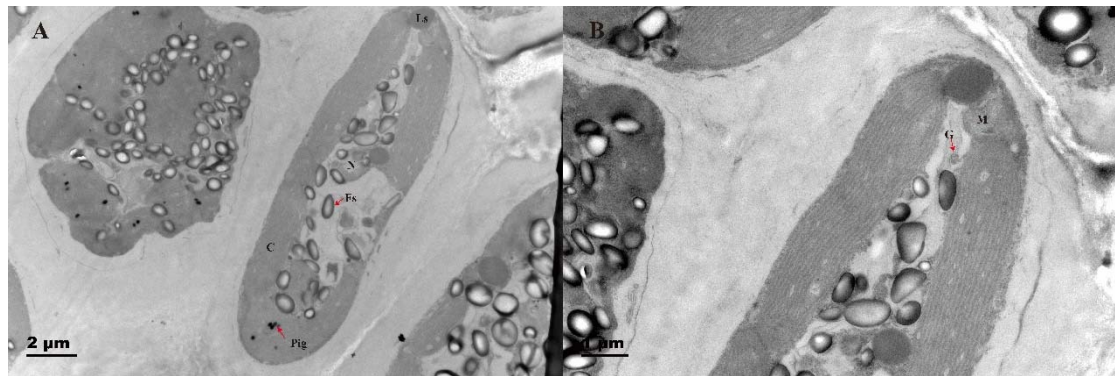

Figure S5 The ultrastructure of *Gracilariopsis lemaneiformis* under transmission electron microscope (TEM). A: ultrastructure of *G. lemaneiformis* at the scale of 2  $\mu$ M; B: ultrastructure of *G. lemaneiformis* at the scale of 1  $\mu$ M. C, chloroplast; N, nuclear; Fs, floridean starch; Pig, pigment; Ls, liposome; G, Glogi complex; M, mitochondria.
